# Supplementary material for: Improving Internal Medicine Residents’ Colorectal Cancer Screening Knowledge Using a Smartphone App: Pilot Study
Source: PubMed Central journal article supplement (PMC5871737; doi:10.2196/mededu.9635), 2018-03-13
Supplement: mededu_v4i1e10_app7.pdf [file mededu_v4i1e10_app7.pdf]

Number of Responders Correctly identifying follow up after colonoscopy findings

| CORRECT RESPONSE                                    | PRE           | POS T         |                         | PRE           | POS T         |                         | PRE            | POS T         |               | PRE-TEST      |               |                |                                    | POST-TEST     |               |              |                         |                | PRE           | POS T        |  |
|-----------------------------------------------------|---------------|---------------|-------------------------|---------------|---------------|-------------------------|----------------|---------------|---------------|---------------|---------------|----------------|------------------------------------|---------------|---------------|--------------|-------------------------|----------------|---------------|--------------|--|
|                                                     | PGY 1<br>n=22 | PGY 1<br>n=20 | P                       | PGY 2<br>n=15 | PGY 2<br>n=11 | P                       | PGY 3<br>n=13  | PGY 3<br>n=10 | P             | PGY 1<br>n=22 | PGY 2<br>n=15 | PGY 3<br>n=13  | P                                  | PGY 1<br>n=20 | PGY 2<br>n=11 | PGY3<br>n=10 | P                       | Total<br>n=50  | Total<br>n=41 | P            |  |
| <b>10 Years in Small Hyperplastic Rectal Polyps</b> | 9<br>(40.9%)  | 13<br>(65.0%) | 0.1<br>19               | 9<br>(60.0%)  | 10<br>(90.1%) | 0.1<br>78               | 13(1<br>00.0%) | 9<br>(90.0%)  | 0.<br>43<br>5 | 9<br>(40.9%)  | 9<br>(60.0%)  | 13<br>(100.0%) | <b>0.0</b><br><b>0</b><br><b>1</b> | 13<br>(65.0%) | 10<br>(90.1%) | 9<br>(90.0%) | 0.2<br>22               | 31<br>(62.0%)  | 32<br>(78.0%) | 0.099        |  |
| <b>5 Years in 1 or 2 Small Tubular adenomas</b>     | 9<br>(40.9%)  | 9<br>(45.0%)  | 0.7<br>89               | 9<br>(60.0%)  | 8<br>(72.7%)  | 0.6<br>83               | 10<br>(76.9%)  | 9<br>(90.0%)  | 0.<br>60<br>4 | 9<br>(40.9%)  | 9<br>(60.0%)  | 10<br>(76.9%)  | 0.<br>1<br>3<br>6                  | 9<br>(45.0%)  | 8<br>(72.7%)  | 9<br>(90.0%) | <b>0.0</b><br><b>42</b> | 28<br>(56.0%)  | 26<br>(63.3%) | 0.474        |  |
| <b>3 Years in 3 to 10 Adenomas</b>                  | 10<br>(45.5%) | 10<br>(50.0%) | 0.7<br>68               | 11<br>(73.3%) | 10<br>(90.1%) | 0.3<br>56               | 10<br>(76.9%)  | 8<br>(80.0%)  |               | 10<br>(45.5%) | 11<br>(73.3%) | 10<br>(76.9%)  | 0.<br>1<br>1<br>2                  | 10<br>(50.0%) | 10<br>(90.1%) | 8<br>(80.0%) | 0.0<br>54               | 31<br>(62.0%)  | 28<br>(68.2%) | 0.099        |  |
| <b>1 to 3 Years in &gt; 10 Adenomas</b>             | 4<br>(18.2%)  | 11<br>(55.0%) | <b>0.0</b><br><b>23</b> | 3<br>(20.0%)  | 8<br>(72.7%)  | <b>0.0</b><br><b>15</b> | 7<br>(53.8%)   | 5<br>(50.0%)  |               | 4<br>(18.2%)  | 3<br>(20.0%)  | 7<br>(53.8%)   | 0.<br>7<br>3                       | 11<br>(55.0%) | 8<br>(72.7%)  | 5<br>(50.0%) | 0.5<br>55               | 14<br>(28.0%)  | 24<br>(58.5%) | <b>0.003</b> |  |
| <b>2 to 6 Months in Sessile Adenomas</b>            | 4<br>(18.2%)  | 10<br>(50.0%) | <b>0.0</b><br><b>49</b> | 3<br>(20.0%)  | 7<br>(63.4%)  | <b>0.0</b><br><b>43</b> | 4<br>(30.8%)   | 6<br>(60.0%)  | 0.<br>22<br>3 | 4<br>(18.2%)  | 3<br>(20.0%)  | 4<br>(30.8%)   | 0.<br>6<br>8<br>6                  | 10<br>(50.0%) | 7<br>(63.4%)  | 6<br>(60.0%) | 0.7<br>78               | 11(22<br>.02%) | 23<br>(56.1%) | <b>0.001</b> |  |
